# Supplementary material for: A nutritional assessment tool, GNRI, predicts sarcopenia and its components in type 2 diabetes mellitus: A Japanese cross-sectional study
Source: PubMed Central journal article supplement (PMC9928854; doi:10.3389/fnut.2023.1087471), 2023-02-01
Supplement: Table_1.pdf [file Table_1.pdf]

**Supplemental Table 1. Individual components of the CONUT score**

| Lymphocyte (/ $\mu$ L) | Ly $\geq$ 1600 | 1200 $\leq$ Ly <1600 | 800 $\leq$ Ly <1200 | Ly <800 |       |
|------------------------|----------------|----------------------|---------------------|---------|-------|
| Scoring                | 0              | 1                    | 2                   | 3       | P     |
| Overall                | 51.6%          | 29.3%                | 16.2%               | 2.9%    | 0.632 |
| Sarcopenia –           | 52.1%          | 28.6%                | 16.2%               | 3.2%    |       |
| Sarcopenia +           | 46.7%          | 36.7%                | 16.7%               | 0.0%    |       |
| Men                    | 53.6%          | 26.2%                | 17.5%               | 2.7%    | 0.585 |
| Women                  | 49.4%          | 32.7%                | 14.8%               | 3.1%    |       |
| BMI < 22               | 38.7%          | 32.0%                | 22.7%               | 6.7%    | 0.015 |
| BMI $\geq$ 22          | 55.2%          | 28.5%                | 14.4%               | 1.9%    |       |

  

| Total cholesterol(mg/dL) | TC $\geq$ 180 | 140 $\leq$ TC <180 | 100 $\leq$ TC <140 | TC <100 |       |
|--------------------------|---------------|--------------------|--------------------|---------|-------|
| Scoring                  | 0             | 1                  | 2                  | 3       | P     |
| Overall                  | 48.7%         | 42.6%              | 8.7%               | 0.0%    | 0.331 |
| Sarcopenia –             | 49.8%         | 41.9%              | 8.3%               | 0.0%    |       |
| Sarcopenia +             | 36.7%         | 50.0%              | 13.3%              | 0.0%    |       |
| Men                      | 43.7%         | 43.2%              | 13.1%              | 0.0%    | 0.005 |
| Women                    | 54.3%         | 42.0%              | 3.7%               | 0.0%    |       |
| BMI < 22                 | 48.0%         | 45.3%              | 6.7%               | 0.0%    | 0.730 |
| BMI $\geq$ 22            | 48.9%         | 41.9%              | 9.3%               | 0.0%    |       |

  

| Albumin (g/dL) | Alb $\geq$ 3.5 | 3.0 $\leq$ Alb <3.5 | 2.5 $\leq$ Alb <3.0 | Alb <2.5 |       |
|----------------|----------------|---------------------|---------------------|----------|-------|
| Scoring        | 0              | 2                   | 4                   | 6        | P     |
| Overall        | 97.1%          | 2.9%                | 0.0%                | 0.0%     | 0.213 |
| Sarcopenia –   | 97.5%          | 2.5%                | 0.0%                | 0.0%     |       |
| Sarcopenia +   | 93.3%          | 6.7%                | 0.0%                | 0.0%     |       |
| Men            | 96.2%          | 3.8%                | 0.0%                | 0.0%     | 0.346 |
| Women          | 98.1%          | 1.9%                | 0.0%                | 0.0%     |       |
| BMI < 22       | 96.0%          | 4.0%                | 0.0%                | 0.0%     | 0.458 |
| BMI $\geq$ 22  | 97.4%          | 2.6%                | 0.0%                | 0.0%     |       |

Ly = lymphocyte count, TC = total cholesterol, Alb = albumin.
