# Supplementary material for: A nutritional assessment tool, GNRI, predicts sarcopenia and its components in type 2 diabetes mellitus: A Japanese cross-sectional study
Source: PubMed Central journal article supplement (PMC9928854; doi:10.3389/fnut.2023.1087471), 2023-02-01
Supplement: Table_2.pdf [file Table_2.pdf]

**Supplemental Table 2.** Multivariate logistic regression analysis on associations of GNRI cutoff for diagnosis of sarcopenia in the overall participants

Dependent variable: Sarcopenia

| Independent variable              | Standardized | P      | VIF   |
|-----------------------------------|--------------|--------|-------|
| Age (year)                        | 0.219        | <0.001 | 1.815 |
| Sex                               | -0.052       | 0.243  | 1.816 |
| Diabetes duration (year)          | -0.002       | 0.972  | 1.346 |
| HbA1c (%)                         | 0.013        | 0.978  | 1.106 |
| eGFR (ml/min/1.73m <sup>2</sup> ) | 0.001        | 0.105  | 1.205 |
| GNRI, point                       | -0.408       | <0.001 | 7.356 |
| BMI (kg/m <sup>2</sup> )          | 0.005        | 0.029  | 6.888 |

VIF: variance inflation factor

Independent variable: GNRI cut-off 98

| Dependent variable    | Model 2 in Table 4    | P      | Model 3               | P     |
|-----------------------|-----------------------|--------|-----------------------|-------|
| Low SMI               | 4.09 ( 2.02 - 8.27 )  | <0.001 | 0.53 ( 0.23 - 1.23 )  | 0.141 |
| Low handgrip strength | 2.60 ( 1.22 - 5.53 )  | 0.013  | 3.39 ( 1.49 - 7.69 )  | 0.004 |
| Low walking speed     | 1.35 ( 0.35 - 5.19 )  | 0.664  | 3.24 ( 0.73 - 14.40 ) | 0.123 |
| Sarcopenia            | 4.67 ( 1.98 - 11.01 ) | <0.001 | 1.95 ( 0.74 - 5.13 )  | 0.175 |

Independent variable: GNRI cut-off 105

| Dependent variable    | Model 2 in Table 4   | P      | Model 3              | P     |
|-----------------------|----------------------|--------|----------------------|-------|
| Low SMI               | 0.75 ( 0.30 - 1.86 ) | <0.001 | 1.73 ( 0.84 - 3.54 ) | 0.140 |
| Low handgrip strength | 1.84 ( 1.04 - 3.25 ) | 0.035  | 2.83 ( 1.14 - 5.66 ) | 0.003 |
| Low walking speed     | 0.66 ( 0.22 - 1.99 ) | 0.457  | 1.46 ( 0.41 - 5.18 ) | 0.555 |
| Sarcopenia            | 9.91 ( 5.72 - 17.2 ) | <0.001 | 3.13 ( 1.19 - 8.25 ) | 0.021 |

Model 2: age (year), sex, diabetes duration (years), HbA1c (%), and eGFR (ml/min/1.73m<sup>2</sup>)

Model 3: age (year), sex, diabetes duration (years), HbA1c (%), eGFR (ml/min/1.73m<sup>2</sup>), and BMI (kg/m<sup>2</sup>)
