# Supplementary material for: A nutritional assessment tool, GNRI, predicts sarcopenia and its components in type 2 diabetes mellitus: A Japanese cross-sectional study
Source: PubMed Central journal article supplement (PMC9928854; doi:10.3389/fnut.2023.1087471), 2023-02-01
Supplement: Table_3.pdf [file Table_3.pdf]

**Supplemental Table 3. General characteristics of participants with type 2 diabetes mellitus in the subgroups accordingly to GNRI**

| Parameters                               | GNRI <98          | GNRI ≥98          |        |
|------------------------------------------|-------------------|-------------------|--------|
|                                          | n=43              | n=436             |        |
| Age, years                               | 76 [70, 80]       | 71 [60, 75]       | <0.001 |
| Men, n (%)                               | 26 (60.5)         | 238 (54.6)        | 0.464  |
| Duration of diabetes, years              | 20 [13, 34]       | 16 [11, 22]       | 0.005  |
| <b>Anthropometry</b>                     |                   |                   |        |
| Body weight, kg                          | 52.1 [45.3, 58.0] | 66.7 [58.1, 79.5] | <0.001 |
| BMI, kg/m <sup>2</sup>                   | 20.3 [18.9, 21.5] | 25.8 [23.2, 29.7] | <0.001 |
| Systolic blood pressure, mmHg            | 125 ± 21          | 133 ± 17          | 0.006  |
| Diastolic blood pressure, mmHg           | 67 ± 12           | 74 ± 11           | <0.001 |
| <b>Nutritional indices</b>               |                   |                   |        |
| GNRI                                     | 94[91, 96]        | 112 [107, 120]    | <0.001 |
| Range                                    | 85-97             | 98-167            |        |
| CONUT, points                            | 2.0 [1.0, 3.0]    | 1.0 [0.0, 2.0]    | 0.002  |
| Range                                    | 0-6               | 0-5               |        |
| CONUT ≥ 2, n (%)                         | 20 (57.1)         | 115 (37.1)        | 0.021  |
| <b>Indices for sarcopenia</b>            |                   |                   |        |
| Skeletal muscle index, kg/m <sup>2</sup> | 6.3[5.4, 7.1]     | 7.2 [6.4, 8.0]    | <0.001 |
| Hand grip strength, kg                   | 24.5 [17.5, 32.5] | 30.5 [23.0, 39.5] | <0.001 |
| Walking speed, m/sec                     | 1.43 [1.18, 1.67] | 1.54 [1.36, 1.82] | 0.060  |
| Low SMI, n (%)                           | 24 (55.8)         | 76 (17.4)         | <0.001 |
| Low hand grip strength, n (%)            | 17 (39.5)         | 68 (15.6)         | <0.001 |
| Low walking speed, n (%)                 | 3 (7.0)           | 19 (4.4)          | 0.434  |
| Sarcopenia, n (%)                        | 13 (30.2)         | 28 (6.4)          | <0.001 |
| <b>Comorbidities</b>                     |                   |                   |        |
| Hypertension, n (%)                      | 30 (69.8)         | 373 (85.6)        | 0.007  |
| Dyslipidemia, n (%)                      | 25 (58.1)         | 384 (88.1)        | <0.001 |
| Coronary heart disease, n (%)            | 5 (11.6)          | 69 (15.8)         | 0.467  |
| Stroke, n (%)                            | 2 (4.7)           | 38 (8.7)          | 0.358  |
| <b>Life habits</b>                       |                   |                   |        |
| Regular walking, n (%)                   | 8 (19.0)          | 110 (25.3)        | 0.367  |
| Current or ex-smoking, n (%)             | 23 (53.5)         | 231 (53.0)        | 0.949  |
| Current or ex-drinking, n (%)            | 12 (27.9)         | 131 (30.0)        | 0.770  |
| <b>Blood measurements</b>                |                   |                   |        |
| Albumin, g/dL                            | 3.8 [3.5, 4.0]    | 4.3 [4.1, 4.5]    | 0.004  |
| AST, U/L                                 | 21 [17, 27]       | 21 [17, 28]       | 0.648  |
| ALT, U/L                                 | 14 [10, 22]       | 19 [14, 30]       | 0.001  |
| γGP, U/L                                 |                   |                   |        |
| Fasting plasma Glucose, mg/dL            | 132 [110, 153]    | 131 [118, 154]    | 0.573  |
| Glycated hemoglobin, %                   | 6.9 [6.5, 7.6]    | 6.9 [6.4, 7.4]    | 0.655  |
| LDLcholesterol, mg/dL                    | 95 [79, 105]      | 102 [82, 120]     | 0.025  |
| HDL cholesterol, mg/dL                   | 54 [44, 70]       | 53 [46, 62]       | 0.358  |
| Triglycerides, mg/dL                     | 73 [54, 106]      | 107 [76, 156]     | <0.001 |
| Creatinine, mg/dl                        | 0.8 [0.65, 1.01]  | 0.83 [0.69, 1.00] | 0.728  |
| eGFR, ml/min/1.73m <sup>2</sup>          | 63.4 [43.3, 79.6] | 63.2 [51.4, 75.8] | 0.847  |
| <b>Glucose-lowering drugs</b>            |                   |                   |        |
| Insulin, n (%)                           | 16 (37.2)         | 116 (26.6)        | 0.138  |
| GLP-1 receptor agonist, n (%)            | 2 (4.7)           | 32 (7.3)          | 0.513  |
| Sulfonylurea, n (%)                      | 7 (16.3)          | 42 (9.6)          | 0.170  |
| Glinide, n (%)                           | 12 (27.9)         | 106 (24.3)        | 0.602  |
| Biguanide, n (%)                         | 18 (41.9)         | 221 (50.7)        | 0.269  |
| DPP4 inhibitor, n (%)                    | 27 (62.8)         | 267 (61.2)        | 0.842  |
| Pioglitazone, n (%)                      | 8 (18.6)          | 139 (31.9)        | 0.072  |
| α-glucosidase inhibitor, n (%)           | 15 (34.9)         | 75 (17.2)         | 0.005  |
| SGLT2 inhibitor, n (%)                   | 3 (7.0)           | 97 (22.2)         | 0.019  |

Data are expressed as median [25%, 75%], Mean ± SD or number (%). GNRI, geriatric nutritional risk index; CONUT, controlling nutritional status; P, provability; BMI, body mass index; SMI, skeletal mass index; AST, aspartate aminotransferase; ALT, alanine aminotransferase; LDL, low-density lipoprotein; HDL, high-density lipoprotein; eGFR: estimated glomerular filtration rate; GLP-1, glucagon-like peptide-1; SGLT2, sodium-glucose cotransporter 2.
